# Supplementary material
Source: publisher figshare collection journal article supplement (https://sage.figshare.com/ndownloader/files/12957284)
Supplement: Supplementary file 1 [file 12957284]

## **Supplemental Appendix 2**

### **Capstone Conversation and Phone Interview Questions**

#### **Capstone Conversation Questions**

1. What have we learned about aligning partners around a shared vision, a common agenda, strategies and resources in support of desired outcomes? In what ways did you apply systems thinking to your work? (Author note: Hierarchy of Choices)
2. How have unique aspects of the partnerships contributed to long-term change in the community? (Author note: Core Theory of Success)
3. What roles have grassroots community members and young people played in leading strategic systems change? (Core Theory of Success)

#### **Phone Interview Questions**

1. How did you become involved with your community's Food & Fitness partnership? What has been your role in it?
2. What have been some key accomplishments from your perspective?
3. Tell me about your experience with systems thinking in Food & Fitness work.
4. Which frameworks, tools, or systems thinking principles have influenced your Food & Fitness work? (The list was used to prompt individuals who were having difficulty remembering names of frameworks or principles.)
  - a. Core theory of success
  - b. Creative tension
  - c. Hierarchy of choices
  - d. Levels of perspective

- e. Vision deployment matrix
  - f. Ladder of inference
  - g. Anticipating "unintended consequences"
  - h. "Slower is faster" for system change
  - i. "Accidental adversaries"
5. What advice do you have for other communities considering using a systems thinking/systems change approach for their work?
6. What else would you like me to know about your work?
